# Supplementary material for: Selective separation of 2,5-dimethylfuran and 2,5-dimethyltetrahydrofuran using nonporous adaptive crystals of a hybrid[3]arene
Source: Royal Society of Chemistry journal article supplement (doi:10.1039/d3nj03837h), 2023-01-01
Supplement: d3nj03837h1.pdf [file d3nj03837h1.pdf]

## Supporting Information

### Selective Separation of 2,5-Dimethylfuran and 2,5-Dimethyltetrahydrofuran using Nonporous Adaptive Crystals of a Hybrid[3]arene

Yang, Liu <sup>1,2,†</sup>, and Yitao Wu <sup>1,2,†,\*</sup>

<sup>1</sup>Stoddart Institute of Molecular Science, Department of Chemistry, Zhejiang University, Hangzhou 310058, P. R. China.

<sup>2</sup>ZJU-Hangzhou Global Scientific and Technological Innovation Center-Hangzhou Zhijiang Silicone Chemicals Co., LTD Joint Lab, Zhejiang-Israel Joint Laboratory of Self-Assembling Functional Materials, ZJU-Hangzhou Global Scientific and Technological Innovation Center, Zhejiang University, Hangzhou 311215, P. R. China.

<sup>†</sup>Yang Liu and Yitao Wu contribute equally to this work.

Corresponding author: yitaowu@zju.edu.cn.

#### Table of Content (26 pages)

|                                                         |     |
|---------------------------------------------------------|-----|
| 1. Materials                                            | S2  |
| 2. Methods                                              | S2  |
| 3. Characterization of Activated Hybrid[3]arene         | S3  |
| 4. Solid–Vapor Adsorption Experiments of Hybrid[3]arene | S7  |
| 5. Recycling Experiments of Hybrid[3]arene              | S20 |
| 6. References                                           | S25 |

## 1. Materials

All starting materials including 2,5-dimethylfuran (**DMeF**) and 2,5-dimethyltetrahydrofuran (**DMeTHF**) were purchased commercially and used as received. Hybrid[3]arene (**HB3**) was synthesized as described previously.<sup>S1</sup> Activated crystalline **HB3** was denoted as **HB3 $\alpha$** . **HB3 $\alpha$**  was prepared according to the previous report.<sup>S2</sup> All the mixture in this work were  $v:v = 1:1$  unless specifically noted.

**Table S1** Physical properties of **DMeF** and **DMeTHF**.<sup>S3</sup>

| Substance     | Melting point<br>(°C) | Boiling point<br>(°C) | Saturated vapor pressure at 298 K<br>(kPa) |
|---------------|-----------------------|-----------------------|--------------------------------------------|
| <b>DMeF</b>   | -62.8                 | 96.0                  | 57.1 $\pm$ 0.2 mmHg                        |
| <b>DMeTHF</b> | -62.8                 | 91.0                  | 62.1 $\pm$ 0.1 mmHg                        |

## 2. Methods

### 2.1. Powder X-Ray Diffraction (PXRD)

The PXRD data were collected on a Rigaku Ultimate-IV X-Ray diffractometer operating at 40 kV/30 mA using the Cu K $\alpha$  line ( $\lambda = 1.5418$  Å). Data were measured over the range 5–35° in 5°/min steps over 8 min.

### 2.2. Thermogravimetric Analysis (TGA)

TGA analysis was carried out using a Q5000IR analyzer (TA Instruments) with an automated vertical overhead thermobalance. The samples were heated at 10 °C/min using N<sub>2</sub> as the protective gas.

### 2.3. Single Crystal Growth

Single crystals of **DMeF@HB3** were grown by placing 5.00 mg of dry **HB3** powder in a small vial, adding 1 mL of **DMeF**, heating until all the powder was dissolved, and allowing to evaporate at room temperature about one week.

### 2.4. Single Crystal X-ray Diffraction (SCXRD) Analyses

Single crystal X-ray diffraction data were collected on a Bruker D8 VENTURE CMOS X-ray diffractometer with a graphite monochromated Mo-K $\alpha$  radiation ( $\lambda = 0.71073$  Å).

## 2.5. Solution <sup>1</sup>H NMR Spectroscopy

Proton nuclear magnetic resonance (<sup>1</sup>H NMR) spectra were recorded using a Bruker Avance III DMX 400 spectrometer, a Bruker Avance III DMX 500 spectrometer, and an Agilent DD2-600 spectrometer.

## 2.6. Gas Chromatography (GC)

Gas chromatography analysis: GC measurements were carried out using an Agilent 7890B instrument configured with a FID detector and a DB-624 column (30 m × 0.53 mm × 3.0 μm). Samples were analyzed using headspace injections and were performed by incubating the sample at 120 °C for 30 min followed by sampling 1.00 mL of the headspace. The following GC method was used: the oven was programmed from 50 °C, and ramped in 10 °C min<sup>-1</sup> increments to 150 °C with 15 min hold; the total run time was 25 min; the injection temperature was 250 °C; the detector temperature was 280 °C with nitrogen, air, and make-up flow-rates of 35, 350, and 35 mL min<sup>-1</sup>, respectively; helium (carrier gas) flow-rate was 3.0 mL min<sup>-1</sup>. The samples were injected in the split mode (30:1).

## 2.7. Gas sorption measurements

N<sub>2</sub> adsorption and desorption isotherms for the activated materials were measured at 77 K using a JW-BK200C 2 instrument.

## 2.8. Theoretical calculations

The geometry optimization and density functional theory (DFT) chemical description for the molecular structures of all **DMeF** and **DMeTHF** compounds were performed using Gaussian09 program<sup>S4</sup> package with M062X exchange-correlation functional and 6-311G\*\* basis set<sup>S5-S6</sup>.

## 3. Characterization of Activated Hybrid[3]arene

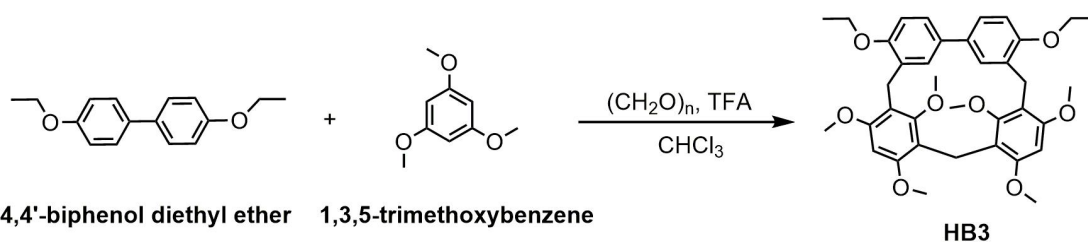

**Scheme S1.** Synthetic route to hybrid[3]arene (**HB3**)

Synthesis of **HB3**: To the solution of 4,4'-biphenol diethyl ether (2.42 g, 10.0 mmol) and 1,3,5-trimethoxybenzene (3.36 g, 20.0 mmol) in CHCl<sub>3</sub> (200 mL), paraformaldehyde (0.900 g, 30.0 mmol) and trifluoroacetic acid (TFA, 10 mL) were added. The mixture was refluxed for 30 min, and the progress was monitored by thin-layer chromatography (TLC). The mixture was cooled to room temperature, and an excess of saturated aqueous Na<sub>2</sub>CO<sub>3</sub> was added to neutralize TFA. The organic phase was separated and the crude product was purified by column chromatography (petroleum ether/ CH<sub>2</sub>Cl<sub>2</sub>, v/v 10:1 to 3:1) to get **HB3** as a white solid (1.67 g, 25%).

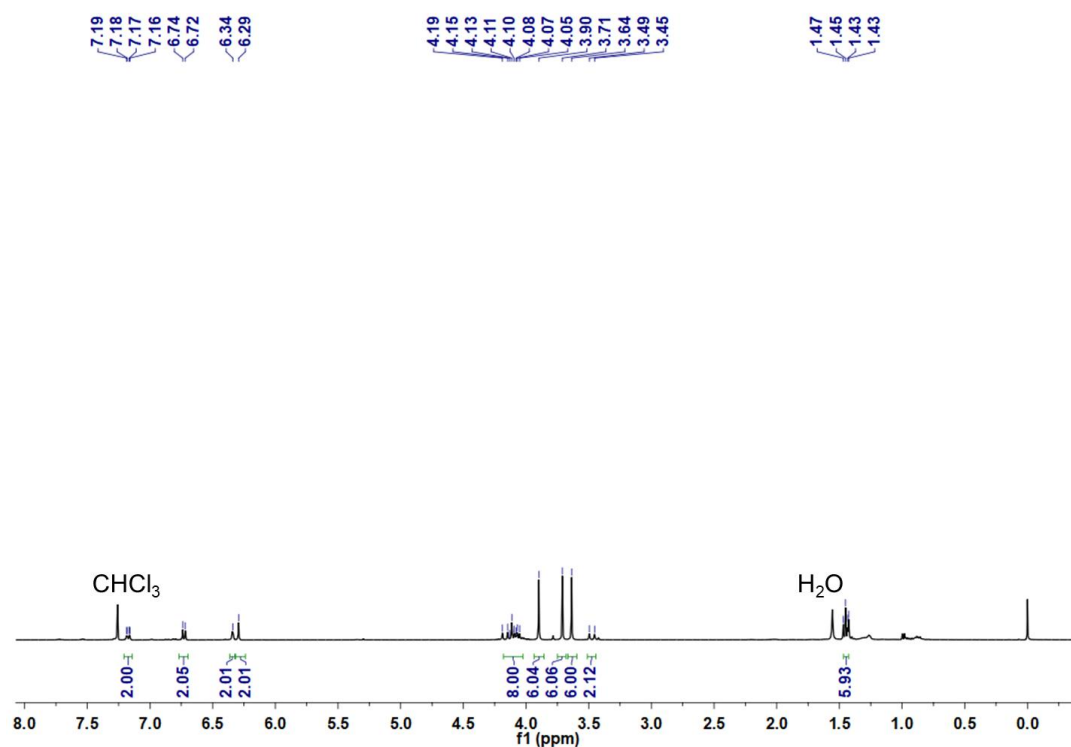

**Fig. S1.** <sup>1</sup>H NMR spectrum (600 MHz, chloroform-*d*, 298 K) of **HB3**.

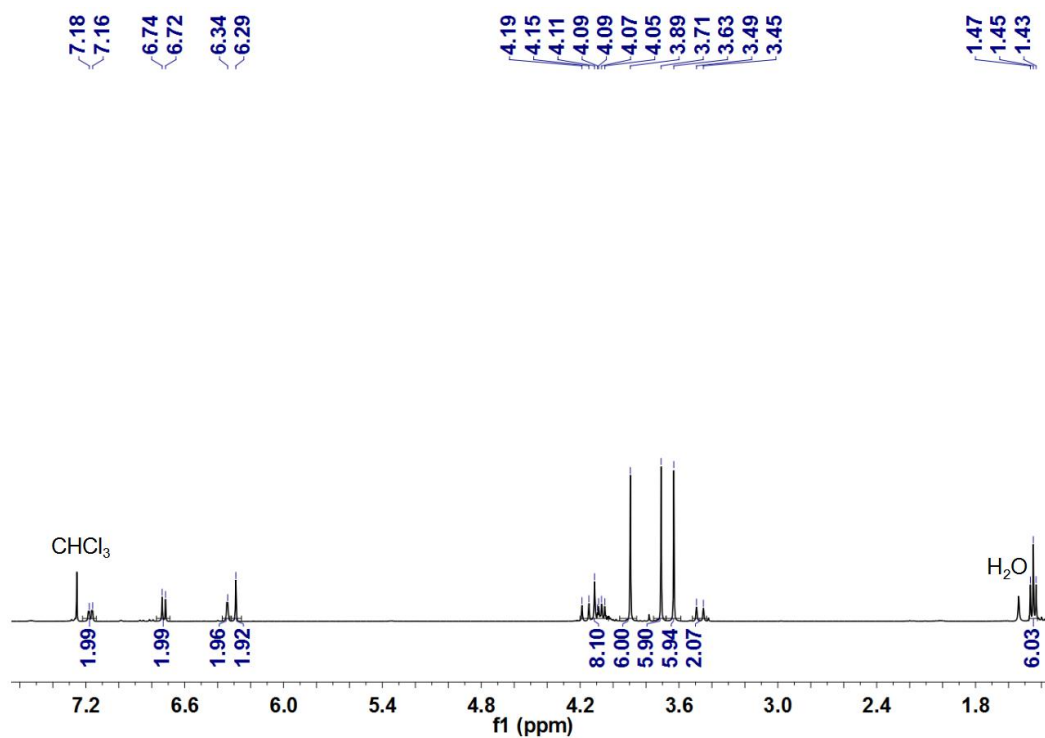

**Fig. S2.** <sup>1</sup>H NMR spectrum (600 MHz, chloroform-*d*, 298 K) of **HB3α**.

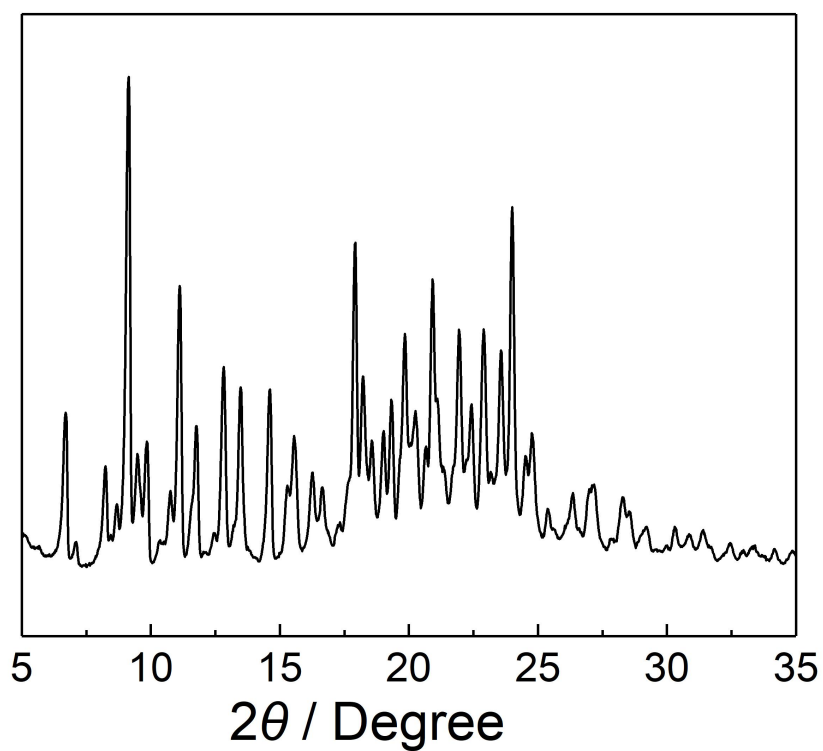

**Fig. S3.** PXRD pattern of **HB3α**.

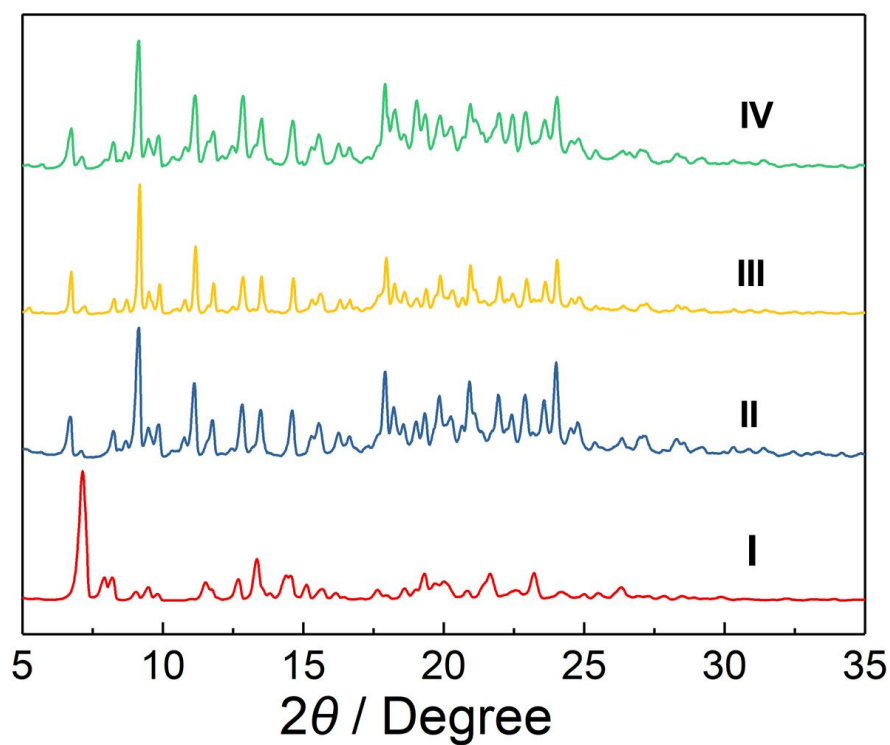

**Fig. S4.** PXRD patterns of (I) as-synthesized **HB3**; (II) **HB3** under vacuum; (III) high temperature; (IV) humid environment conditions.

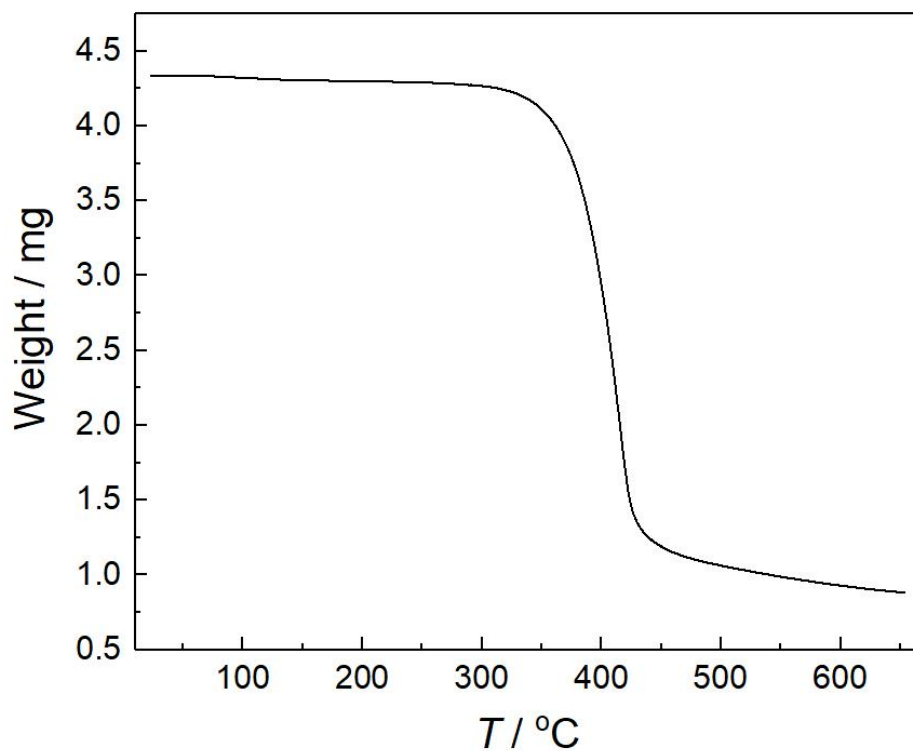

**Fig. S5.** TGA curve of desolvated **HB3 $\alpha$** .

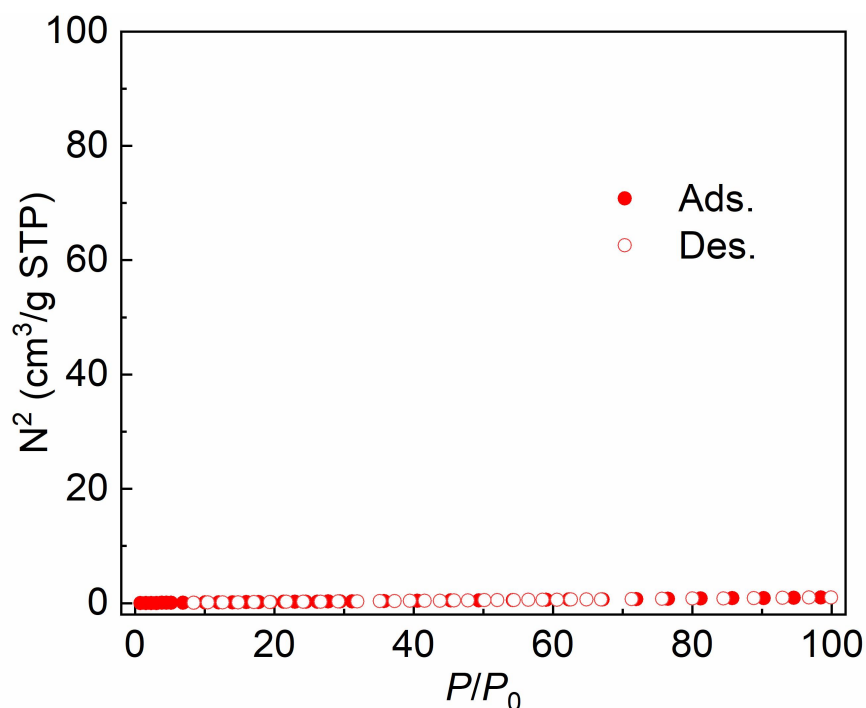

**Fig. S6.** Experimental  $N_2$  adsorption isotherms at 77 K measuring the porosity of activated **HB3 $\alpha$** . The apparent Brunauer-Emmett-Teller (BET) surface area is calculated to be  $2 \text{ m}^2/\text{g}$ , indicating **HB3 $\alpha$**  is nonporous.

#### 4. Solid-Vapor Adsorption Experiments of Hybrid[3]arene

##### 4.1. Single-Component DMeF and DMeTHF Adsorption Experiments

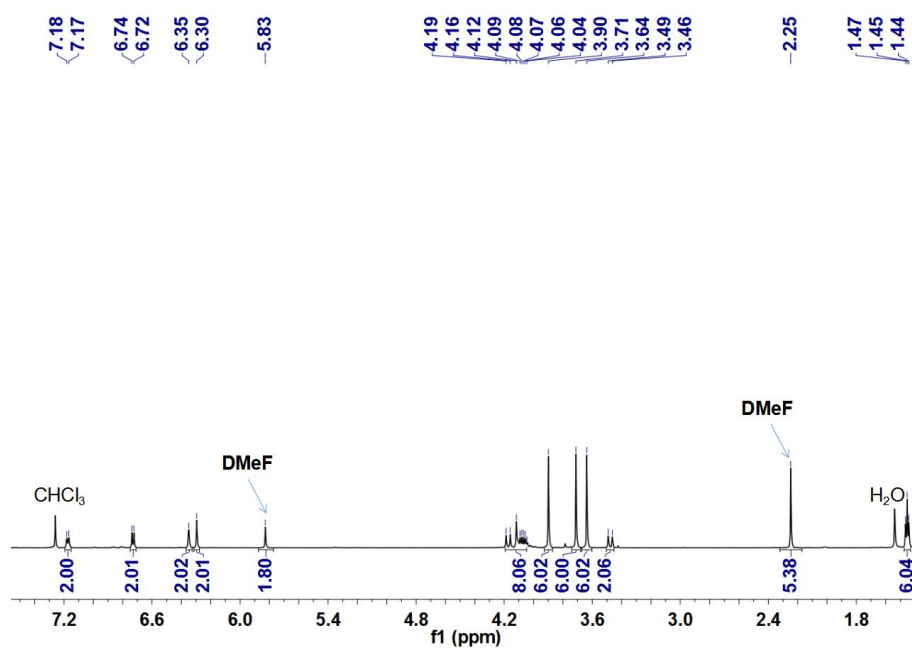

**Fig. S7.**  $^1\text{H}$  NMR spectrum (600 MHz, chloroform-*d*, 298 K) of **HB3 $\alpha$**  after adsorption of **DMeF** vapor.

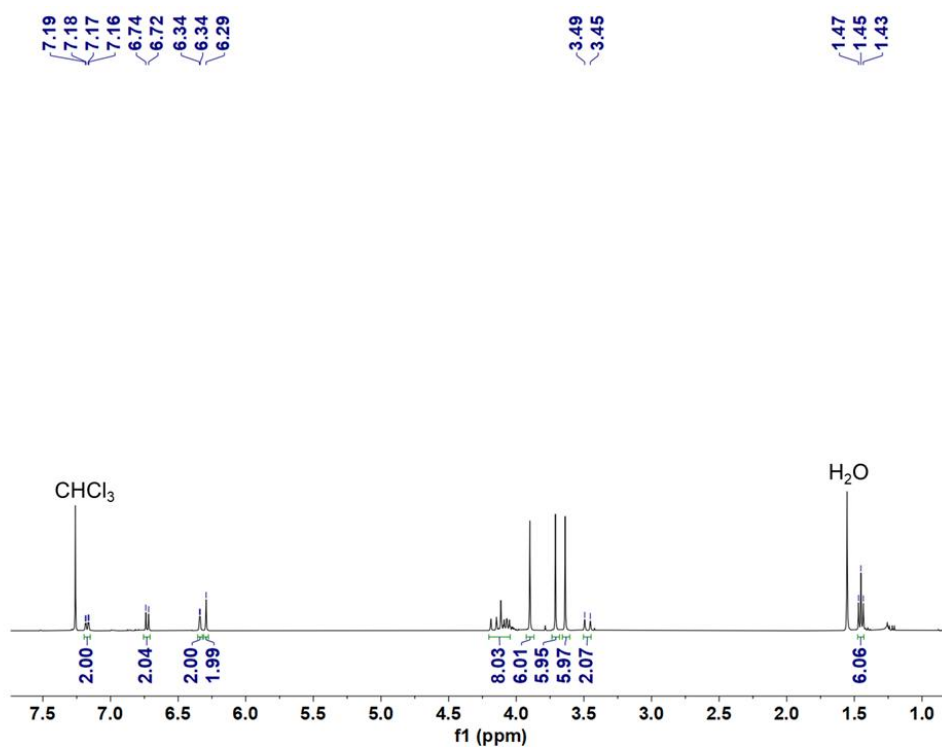

**Fig. S8.**  $^1\text{H}$  NMR spectrum (600 MHz, chloroform-*d*, 298 K) of **HB3 $\alpha$**  after adsorption of **DMeTHF** vapor.

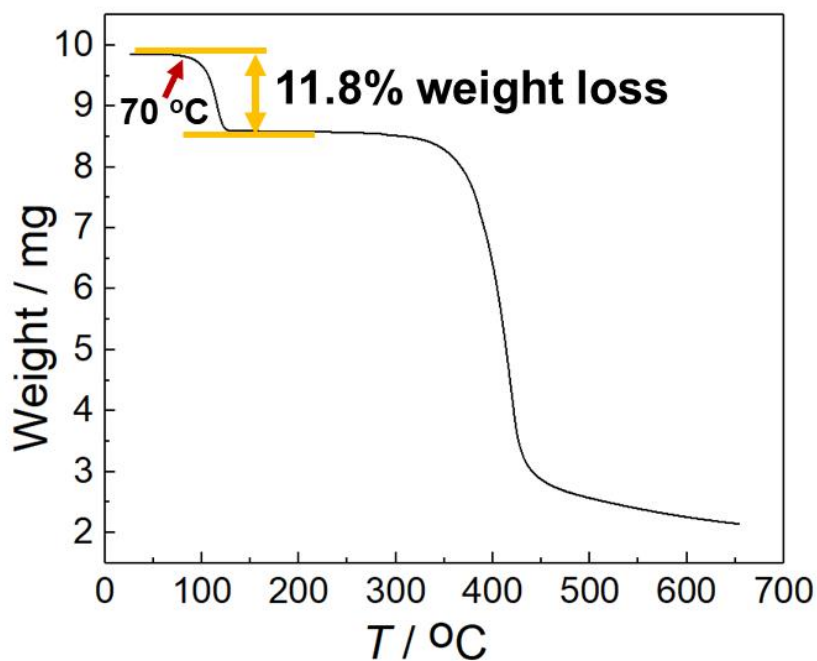

**Fig. S9.** TGA curve of desolvated **HB3 $\alpha$**  after adsorption of **DMeF** vapor. The weight loss below 150 °C can be calculated to one equivalent of **DMeF** molecule *per* **HB3** molecule.



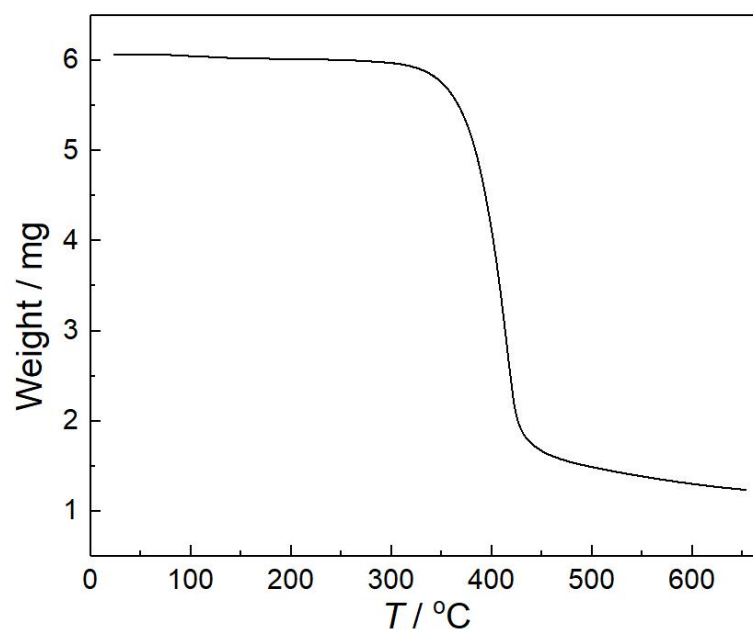

**Fig. S10.** TGA curve of desolvated **HB3 $\alpha$**  after adsorption of **DMeTHF** vapor. TGA results revealed no weight loss, indicating no uptake of **DMeTHF** vapor.

## 4.2. Structural Analyses of Single-Component Vapor Adsorption Experiments

**Table S2.** Experimental single crystal X-ray diffraction data of **DMeF@HB3** structure.

| Formula                                                      | <b>DMeF@HB3</b>                                                              |
|--------------------------------------------------------------|------------------------------------------------------------------------------|
| Empirical formula                                            | C <sub>43</sub> H <sub>50</sub> O <sub>9</sub>                               |
| Formula weight                                               | 710.83                                                                       |
| Temperature/K                                                | 169.99                                                                       |
| Crystal system                                               | triclinic                                                                    |
| Space group                                                  | <i>P</i> $\bar{1}$                                                           |
| <i>a</i> /Å                                                  | 10.8040(3)                                                                   |
| <i>b</i> /Å                                                  | 13.0735(3)                                                                   |
| <i>c</i> /Å                                                  | 15.6468(4)                                                                   |
| $\alpha$ /°                                                  | 109.2350(10)                                                                 |
| $\beta$ /°                                                   | 97.967(2)                                                                    |
| $\gamma$ /°                                                  | 107.3160(10)                                                                 |
| Volume/Å <sup>3</sup>                                        | 1922.21(9)                                                                   |
| <i>Z</i>                                                     | 2                                                                            |
| $\rho_{\text{calc}}$ (g/cm <sup>3</sup> )                    | 1.228                                                                        |
| $\mu$ /mm <sup>-1</sup>                                      | 0.443                                                                        |
| <i>F</i> (000)                                               | 760                                                                          |
| Crystal size/mm <sup>3</sup>                                 | 0.13 × 0.12 × 0.1                                                            |
| Radiation                                                    | GaK $\alpha$ ( $\lambda$ = 1.34139)                                          |
| 2 $\theta$ range for data collection/°                       | 6.754 to 109.886                                                             |
| Index ranges                                                 | -13 ≤ <i>h</i> ≤ 13, -14 ≤ <i>k</i> ≤ 15, -19 ≤ <i>l</i> ≤ 19                |
| Reflections collected                                        | 19307                                                                        |
| Independent reflections                                      | 7275 [ <i>R</i> <sub>int</sub> = 0.0894, <i>R</i> <sub>sigma</sub> = 0.0986] |
| Data/restraints/parameters                                   | 7275/210/546                                                                 |
| Goodness-of-fit on <i>F</i> <sup>2</sup>                     | 1.018                                                                        |
| Final <i>R</i> indexes [ <i>I</i> ≥ 2 $\sigma$ ( <i>I</i> )] | <i>R</i> <sub>1</sub> = 0.0807, <i>wR</i> <sub>2</sub> = 0.2057              |
| Final <i>R</i> indexes [all data]                            | <i>R</i> <sub>1</sub> = 0.1151, <i>wR</i> <sub>2</sub> = 2377                |
| Largest difference peak/hole/e Å <sup>-3</sup>               | 0.35/-0.41                                                                   |
| CCDC-number                                                  | 1975518                                                                      |

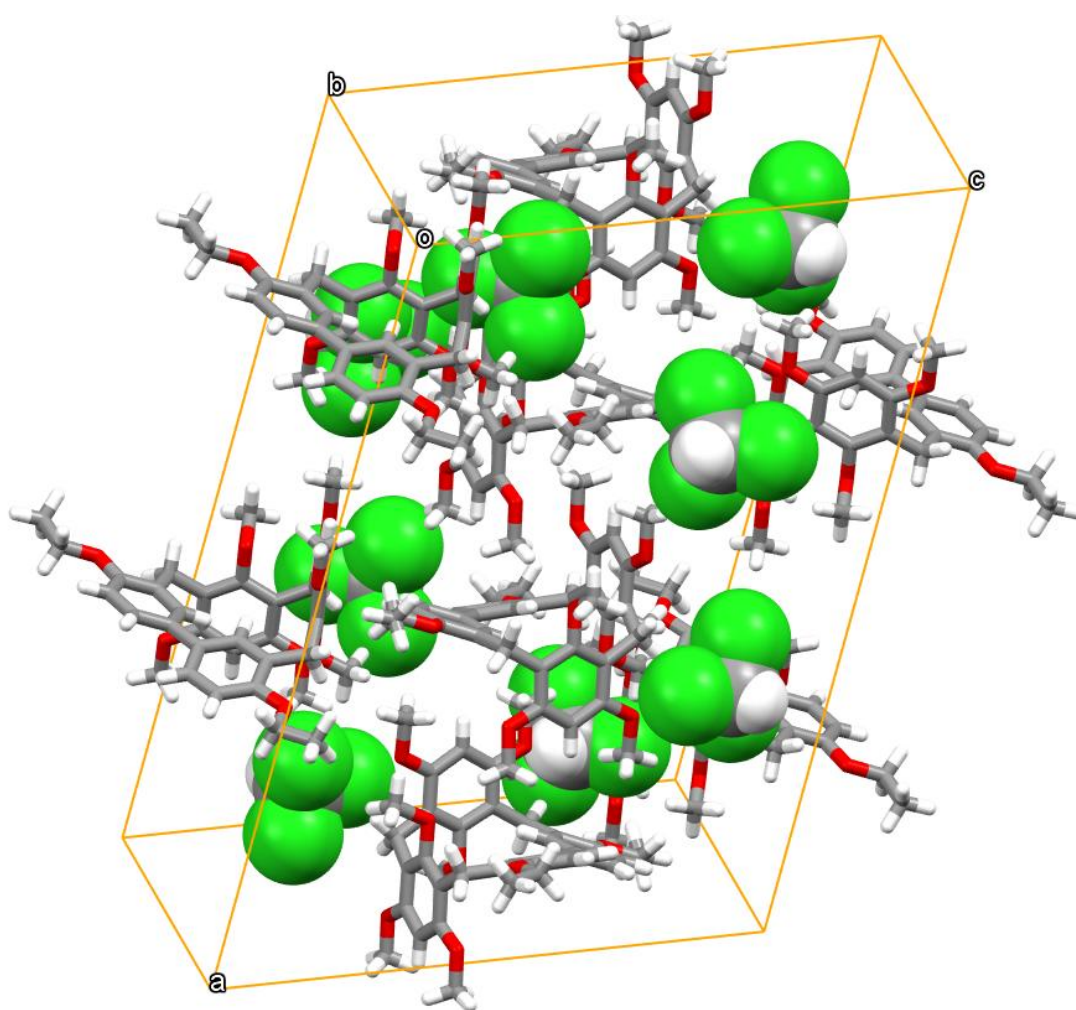

**Fig. S11.** Capped-stick and spacefill representation of the single crystal structure of  $\text{CHCl}_3@HB3$  in a unit cell. The elementary cell is marked with an orange cuboid ( $a = 28.16(6) \text{ \AA}$ ,  $b = 14.15(3) \text{ \AA}$ ,  $c = 19.61(4) \text{ \AA}$ ,  $\alpha = 90^\circ$ ,  $\beta = 106.28(10)^\circ$ ,  $\gamma = 90^\circ$ , space group:  $C2/C$ ). Carbon atoms are grey, oxygen atoms are red, chlorine atoms are green, and hydrogen atoms are white.

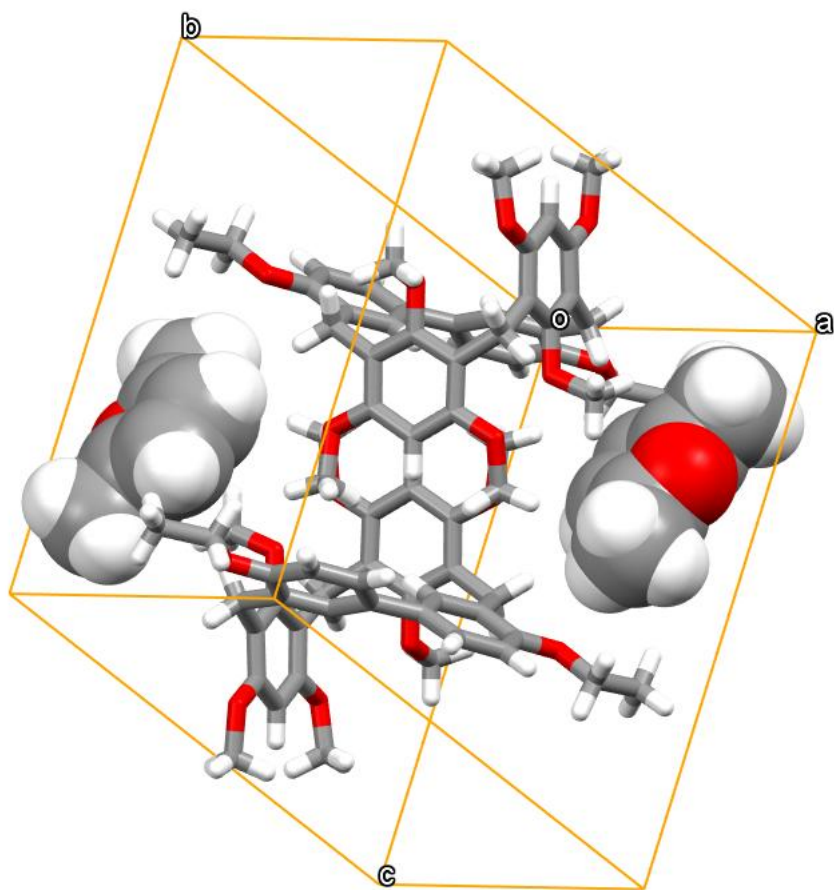

**Fig. S12.** Capped-stick and spacefill representation of the single crystal structure of **DMeF@HB3** in a unit cell. Carbon atoms are grey, oxygen atoms are red, and hydrogen atoms are white. The elementary cell is marked with an orange cuboid ( $a = 10.80(3) \text{ \AA}$ ,  $b = 13.07(3) \text{ \AA}$ ,  $c = 15.65(4) \text{ \AA}$ ,  $\alpha = 109.24(10)^\circ$ ,  $\beta = 97.98(2)^\circ$ ,  $\gamma = 107.32(10)^\circ$ , space group:  $P\bar{1}$ ). Compared with the single crystal structure of **CHCl<sub>3</sub>@HB3**, the unit cell parameters have obvious difference, this also indicates the adaptive nature of **HB3** crystals.

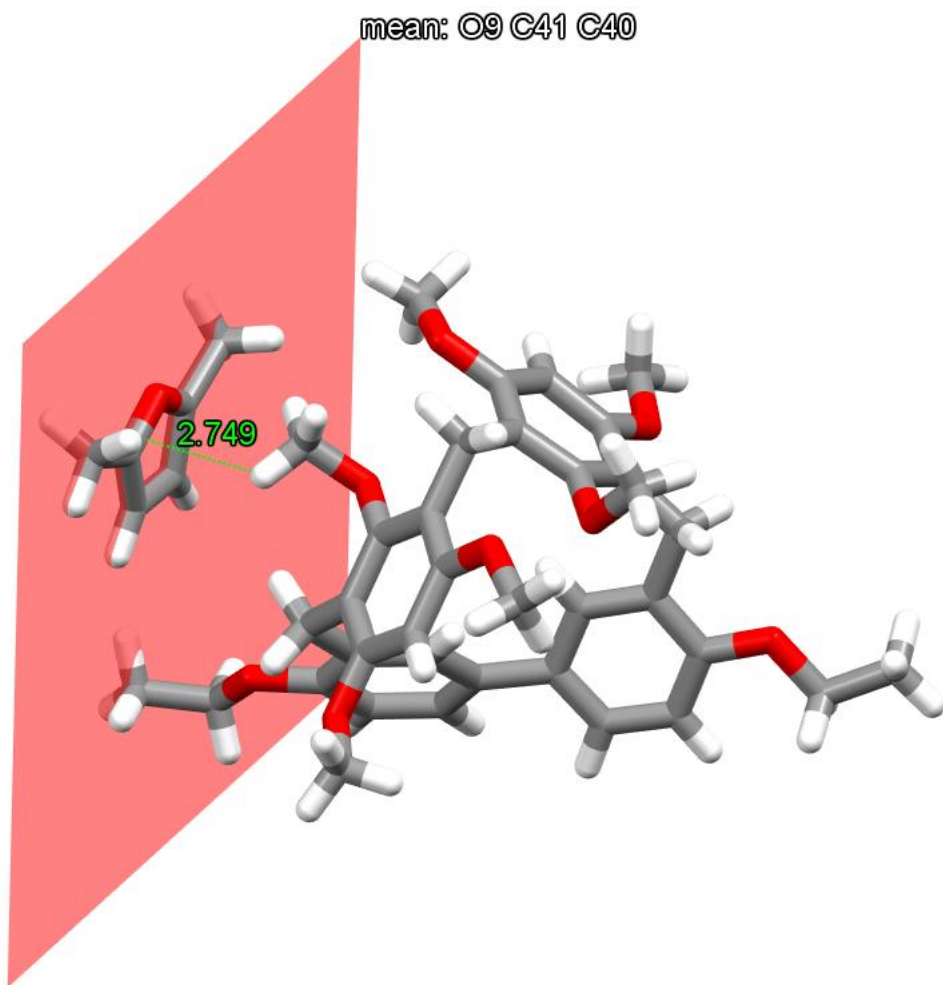

**Fig. S13.** Capped-stick representation of the single crystal structure of **DMeF@HB3**. Carbon atoms are grey, hydrogen atoms are white, and oxygen atoms are red. [C–H $\cdots$  $\pi$ ] distance (Å) and angle (deg): 2.75, 134.34.

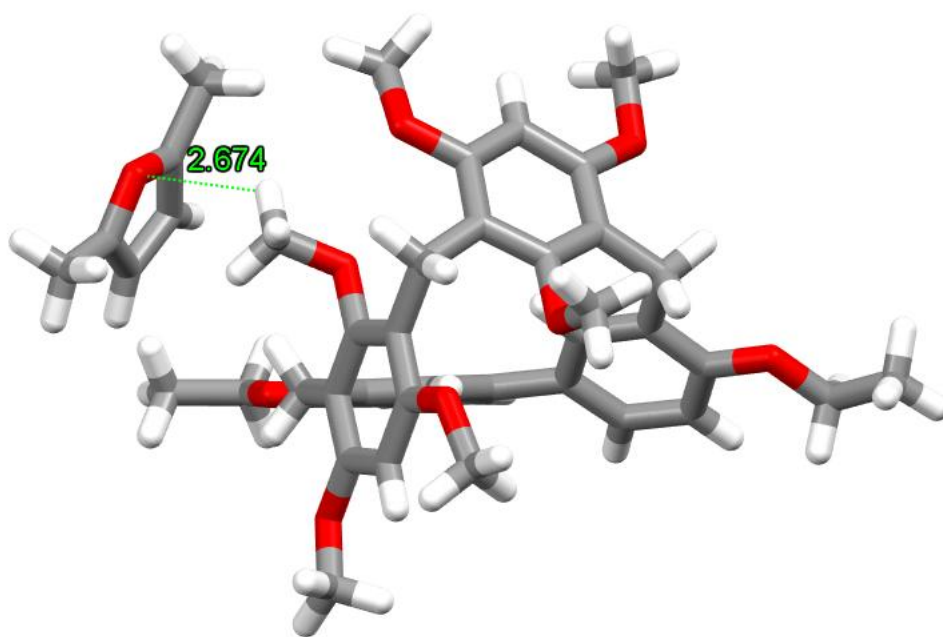

**Fig. S14.** Capped-stick representation of the single crystal structure of **DMeF@HB3**. Carbon atoms are grey, hydrogen atoms are white, and oxygen atoms are red. Hydrogen-bond parameters: [C...O] distances (Å), [H...O] distances (Å) and [C-H...O] angles (deg) of [C-H...O] hydrogen bonds, 3.22, 2.67, 115.17.

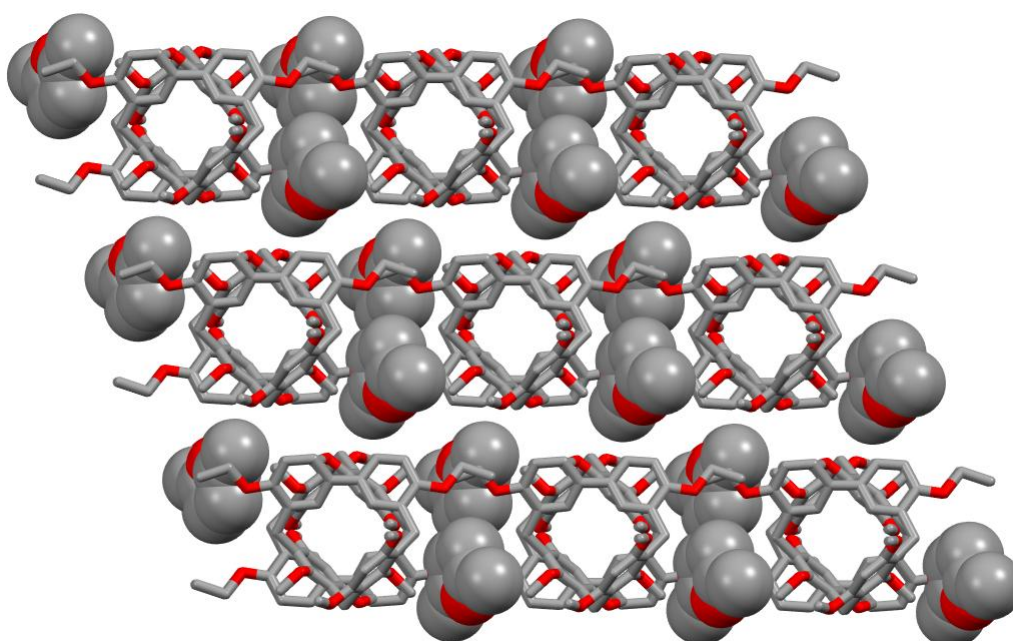

**Fig. S15.** Capped-stick and spacefill representation of the single crystal structure of **DMeF@HB3** in a packing mode. Carbon atoms are grey and oxygen atoms are red. Hydrogen atoms are omitted for clarity.

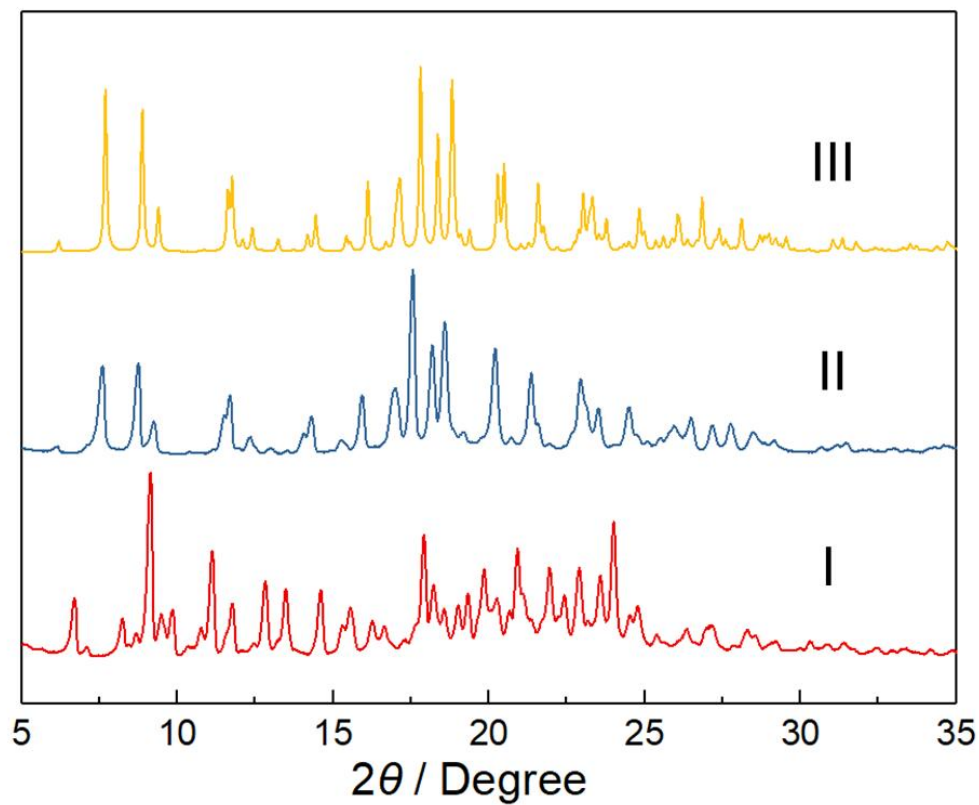

**Fig. S16.** PXRD patterns of **HB3**: (I) activated **HB3 $\alpha$** ; (II) after adsorption of **DMeF** vapor; (III) simulated from single crystal structure of **DMeF@HB3**.

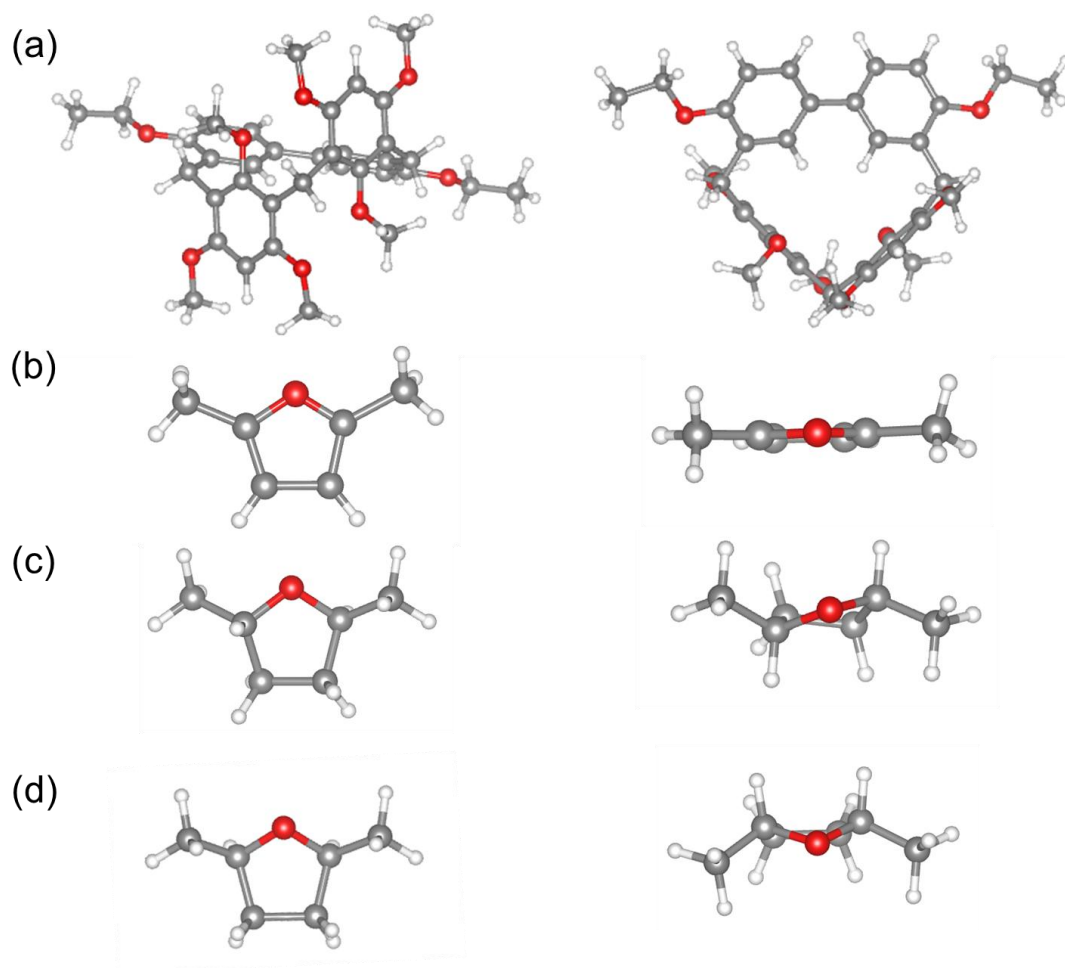

**Fig. S17.** The optimized structures of (a) **HB3**, (b) **DMeF**, (c) *trans*-**DMeTHF** and (d) *cis*-**DMeTHF**.



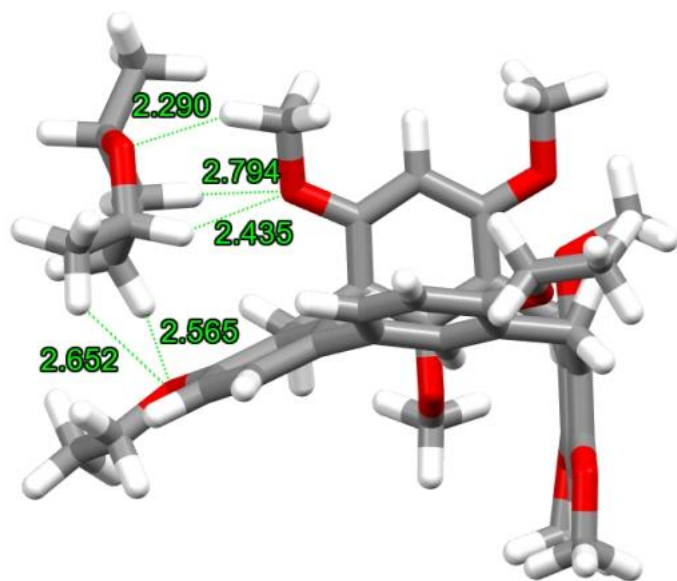

**Fig. S18.** Capped-stick representation of the calculated structure of *trans*-DMeTHF@HB3. Carbon atoms are grey, hydrogen atoms are white, and oxygen atoms are red. Hydrogen-bond parameters: [C...O] distances (Å), [H...O] distances (Å) and [C-H...O] angles (deg) of [C-H...O] hydrogen bonds, 3.25, 2.29, 145.60; 3.61, 2.79, 131.33; 3.29, 2.44, 133.07; 3.33, 2.57, 126.63; 3.46, 2.65, 130.09.

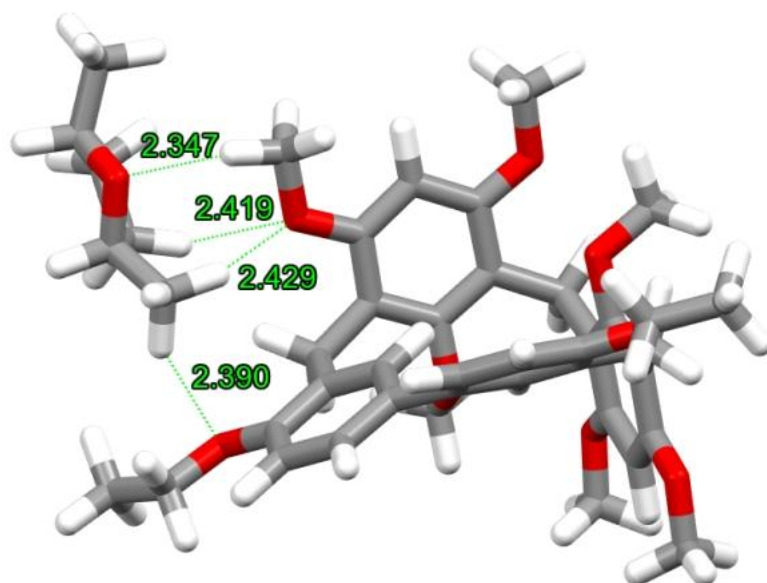

**Fig. S19.** Capped-stick representation of the calculated structure of *cis*-DMeTHF@HB3. Carbon atoms are grey, hydrogen atoms are white, and oxygen atoms are red. Hydrogen-bond parameters: [C $\cdots$ O] distances (Å), [H $\cdots$ O] distances (Å) and [C–H $\cdots$ O] angles (deg) of [C–H $\cdots$ O] hydrogen bonds, 3.42, 2.35, 166.01; 3.38, 2.42, 145.22; 3.39, 2.43, 145.83; 3.36, 2.39, 147.49.

**Table S3.** Calculated binding energies of DMeF/DMeTHF in HB3.

| Substance            | Number of guest molecules in HB3 | $E_{BE}$ (kJ/mol) |
|----------------------|----------------------------------|-------------------|
| DMeF                 | 1                                | –33.98            |
| <i>trans</i> -DMeTHF | 1                                | –30.75            |
| <i>cis</i> -DMeTHF   | 1                                | –28.24            |

#### 4.3. DMeF and DMeTHF Mixture Adsorption Experiments

For each mixture solid–vapor experiment, an open 5.00 mL vial containing 20.00 mg of guest-free HB3 $\alpha$  adsorbent was placed in a sealed 20.00 mL vial containing 1.00 mL of a 50:50 v/v DMeF and DMeTHF mixture. The relative uptake amount of MeF or DMeF in HB3 $\alpha$  was measured by heating the crystals to release the adsorbed vapor

using GC method. Before measurement, the crystals were heated at 60 °C to remove the surface-physically adsorbed vapor.

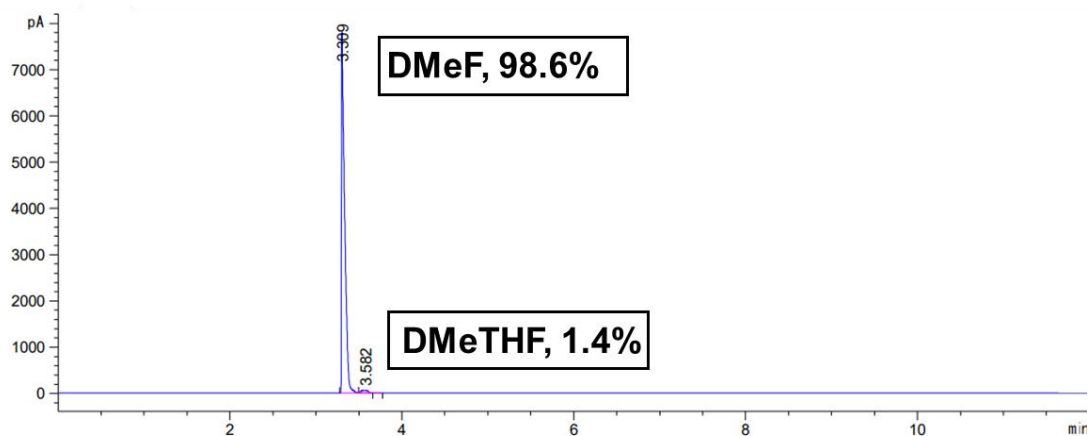

**Fig. S20.** GC measurements of the relative uptake of **DMeF/DMeTHF** in **HB3 $\alpha$**  after 20.00 mg of crystals were put in 1 mL of a 50:50 v/v **DMeF/DMeTHF** mixture for 30 hours.

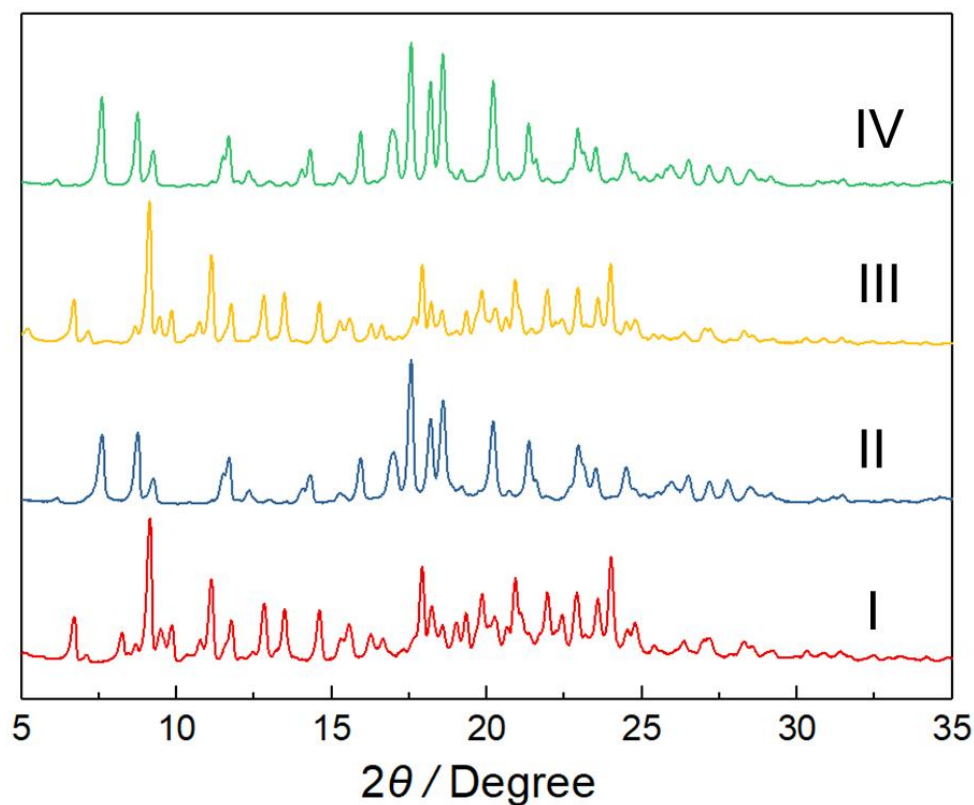

**Fig. S21.** PXRD patterns of **HB3**: (I) activated **HB3 $\alpha$** ; (II) after adsorption of **DMeF** vapor; (III) after adsorption of **DMeTHF** vapor; (IV) after adsorption of a 50:50 v/v **DMeF** and **DMeTHF** mixture vapor.

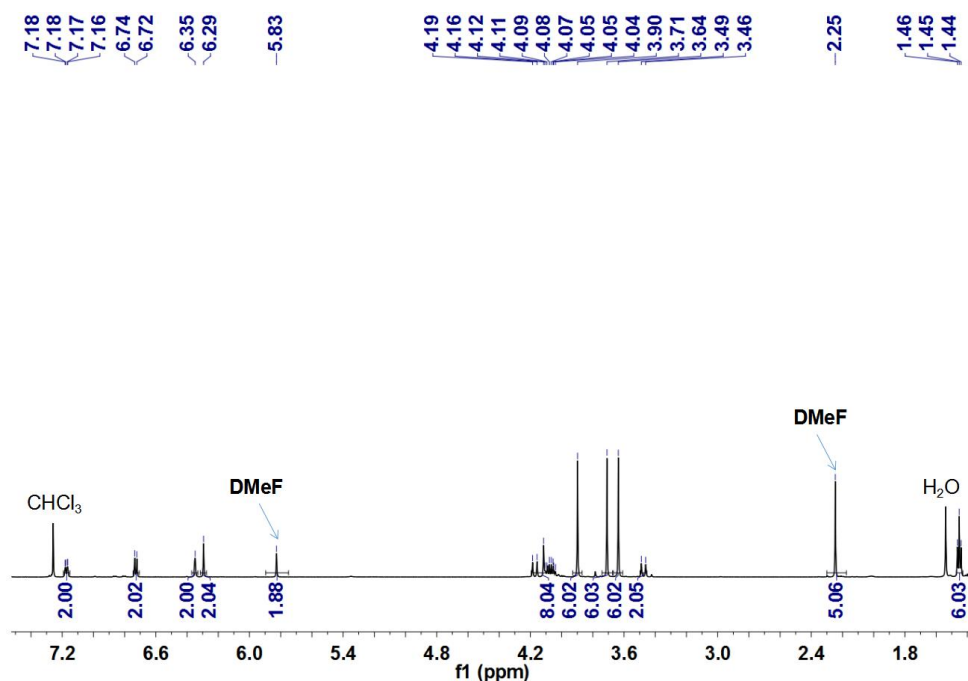

**Fig. S22.**  $^1\text{H}$  NMR spectrum (600 MHz, chloroform-*d*, 298 K) of **HB3 $\alpha$**  after adsorption of a 50:50 v/v **MeF** and **DMeTHF** mixture vapor.

### 5. Recycling Experiments of Hybrid[3]arene

An open 5.00 mL vial containing 20.00 mg of **DMeF@HB3** was desolvated under vacuum at 150 °C overnight. The resultant crystals were characterized by TGA, PXRD and  $^1\text{H}$  NMR methods.

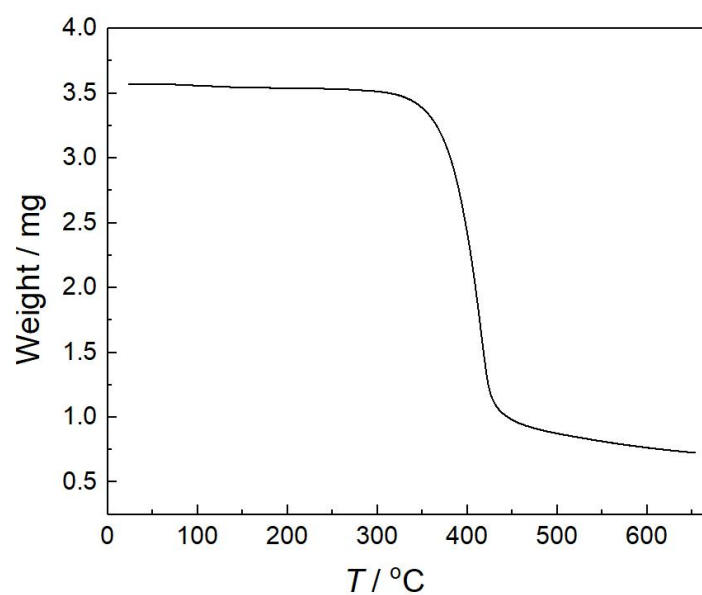

**Fig. S23.** TGA curve of **DMeF@HB3** after removal of **DMeF**.

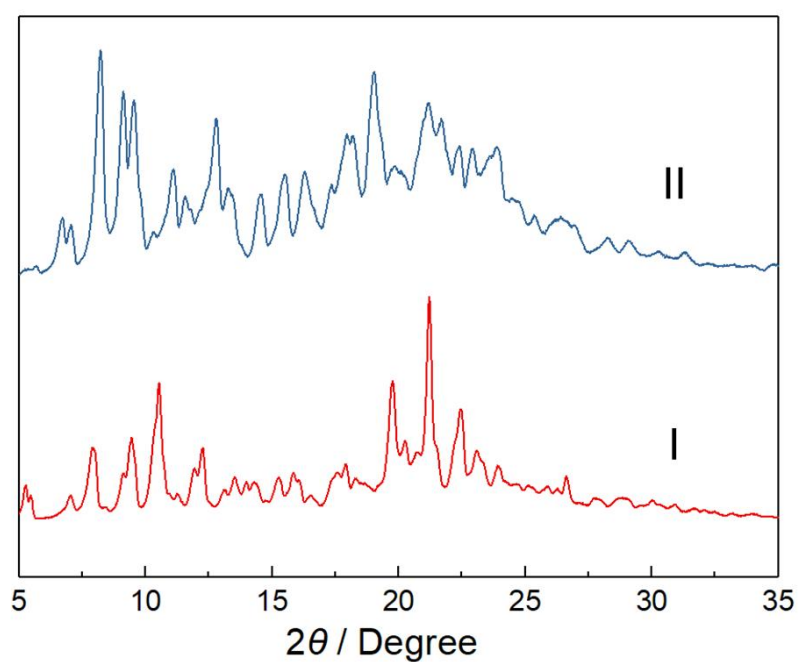

**Fig. S24.** PXRD patterns of **HB3**: (I) **HB3 $\alpha$** ; (II) desolvated **DMeF@HB3**. This result indicated that **DMeF@HB3** could transform back to activated **HB3 $\alpha$**  after removal of **DMeF**.

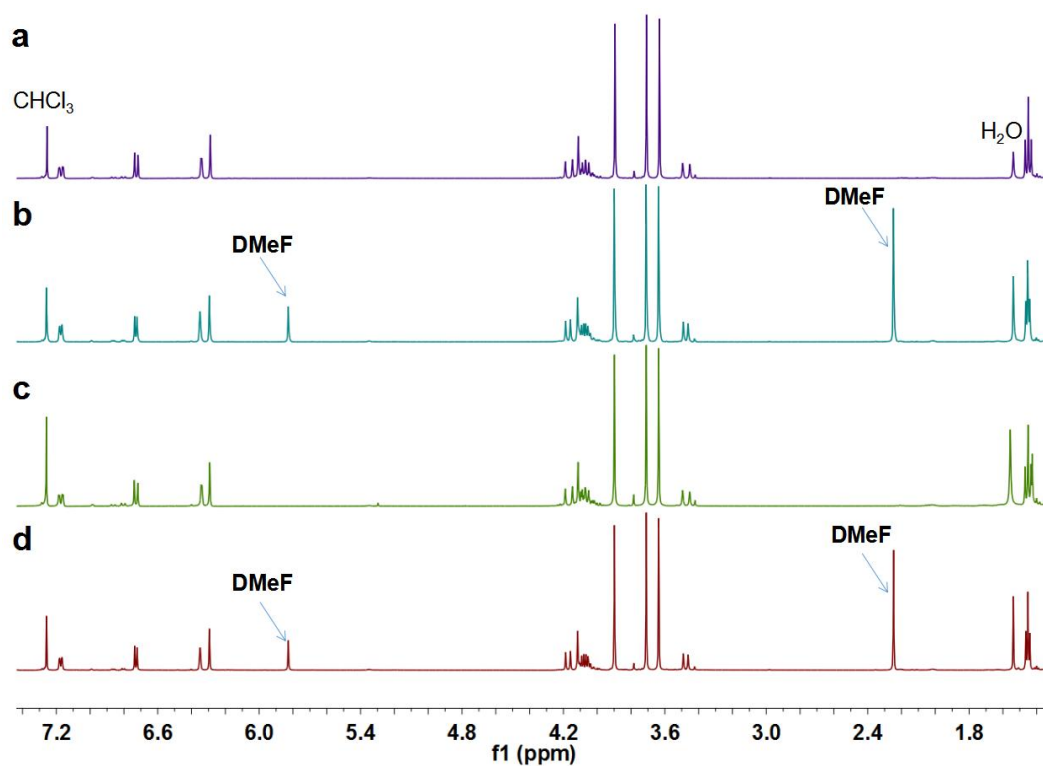

**Fig. S25.**  $^1\text{H}$  NMR spectra (400 MHz, chloroform-*d*, 298 K): (a) original **HB3 $\alpha$** ; (b) **HB3 $\alpha$**  after adsorption of **DMeF** vapor; (c) **DMeF@HB3** after removal of **DMeF**; (d) desolvated **DMeF@HB3** after adsorption of **DMeF** vapor.

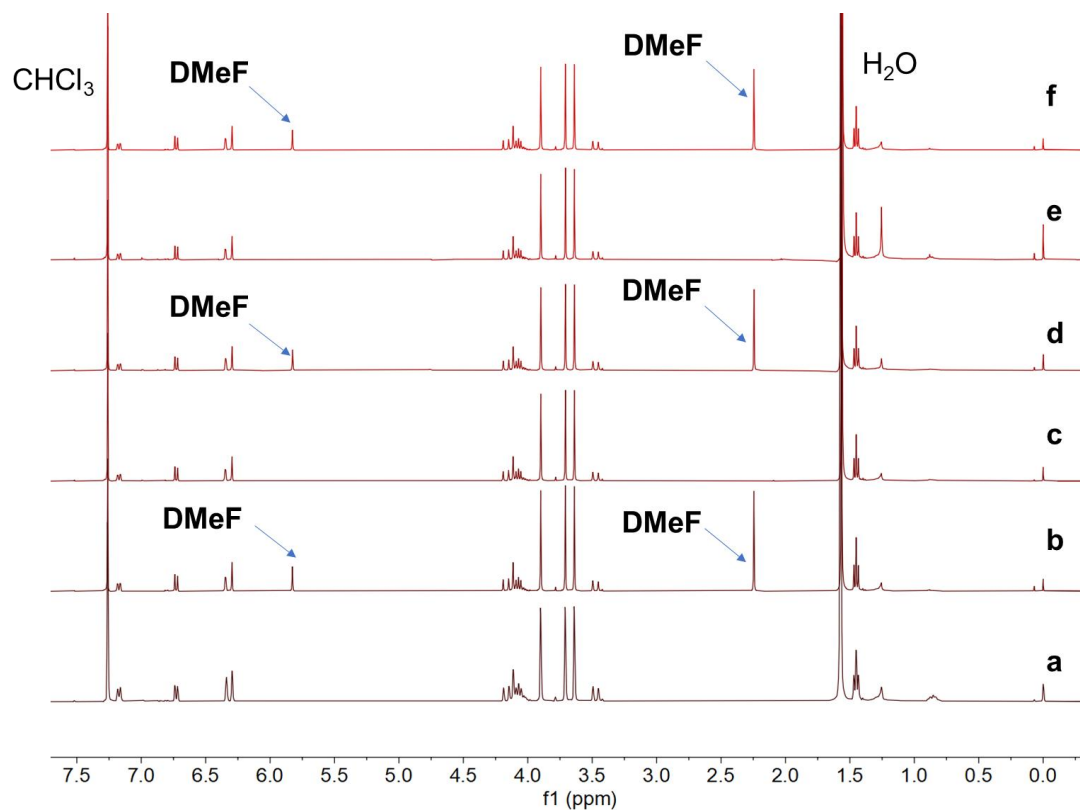

**Fig. S26.**  $^1\text{H}$  NMR spectra (400 MHz, chloroform-*d*, 298 K): (a) original **HB3 $\alpha$** ; (b) **HB3 $\alpha$**  after adsorption of **DMeF** vapor; (c) **DMeF@HB3** after removal of **DMeF** with five cycles; (d) desolvated **DMeF@HB3** after adsorption of **DMeF** vapor with five cycles; (e) **DMeF@HB3** after removal of **DMeF** with ten cycles; (f) desolvated **DMeF@HB3** after adsorption of **DMeF** vapor with ten cycles.

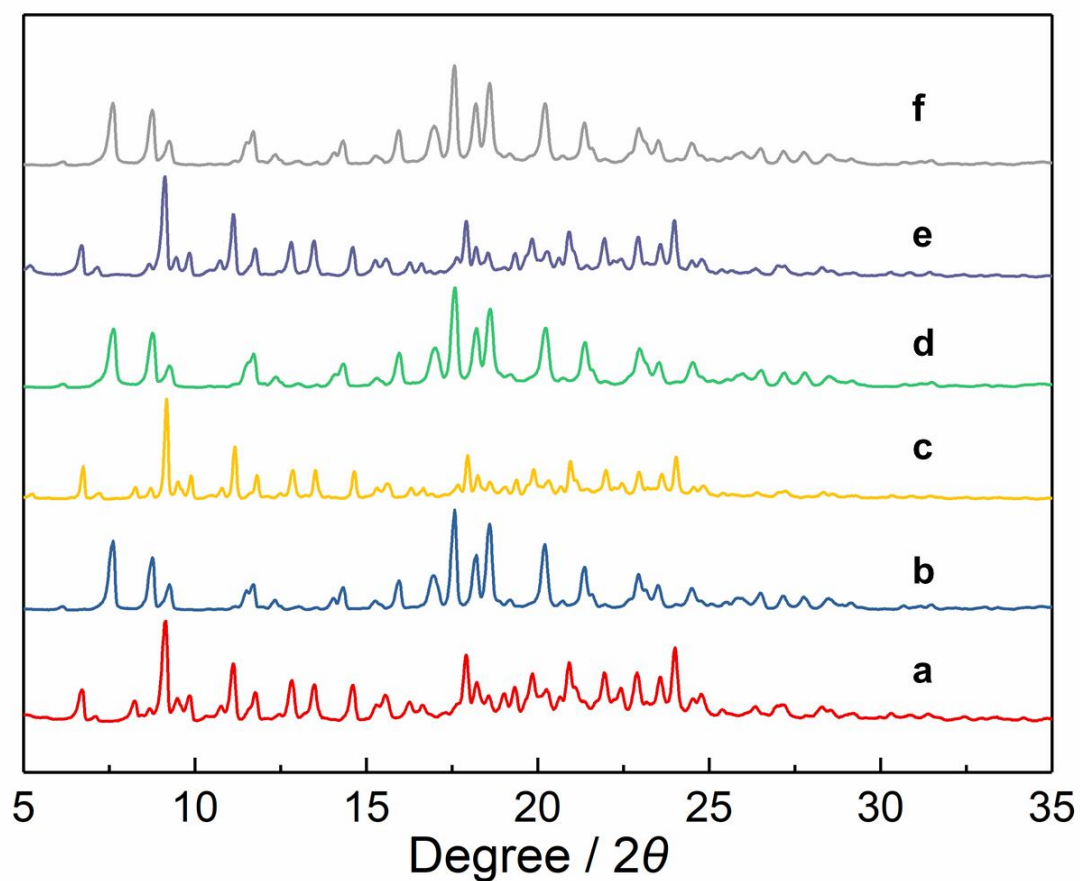

**Fig. S27.** PXRD patterns of **HB3**: (a) original **HB3 $\alpha$** ; (b) **HB3 $\alpha$**  after adsorption of **DMeF** vapor; (c) **DMeF@HB3** after removal of **DMeF** with five cycles; (d) desolvated **DMeF@HB3** after adsorption of **DMeF** vapor with five cycles; (e) **DMeF@HB3** after removal of **DMeF** with ten cycles; (f) desolvated **DMeF@HB3** after adsorption of **DMeF** vapor with ten cycles.

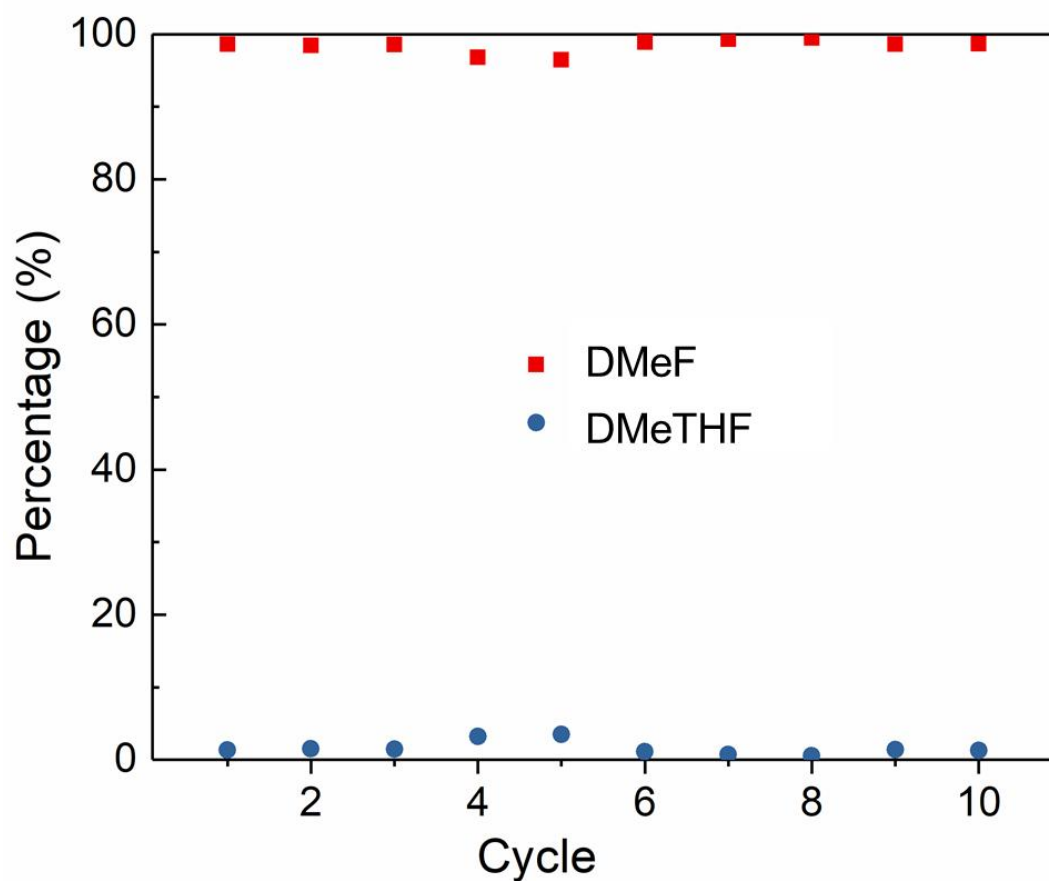

**Fig. S28.** Relative uptake of **DMeF** and **DMeTHF** by **HB3 $\alpha$**  over 30 hours after **HB3 $\alpha$**  was recycled ten times.



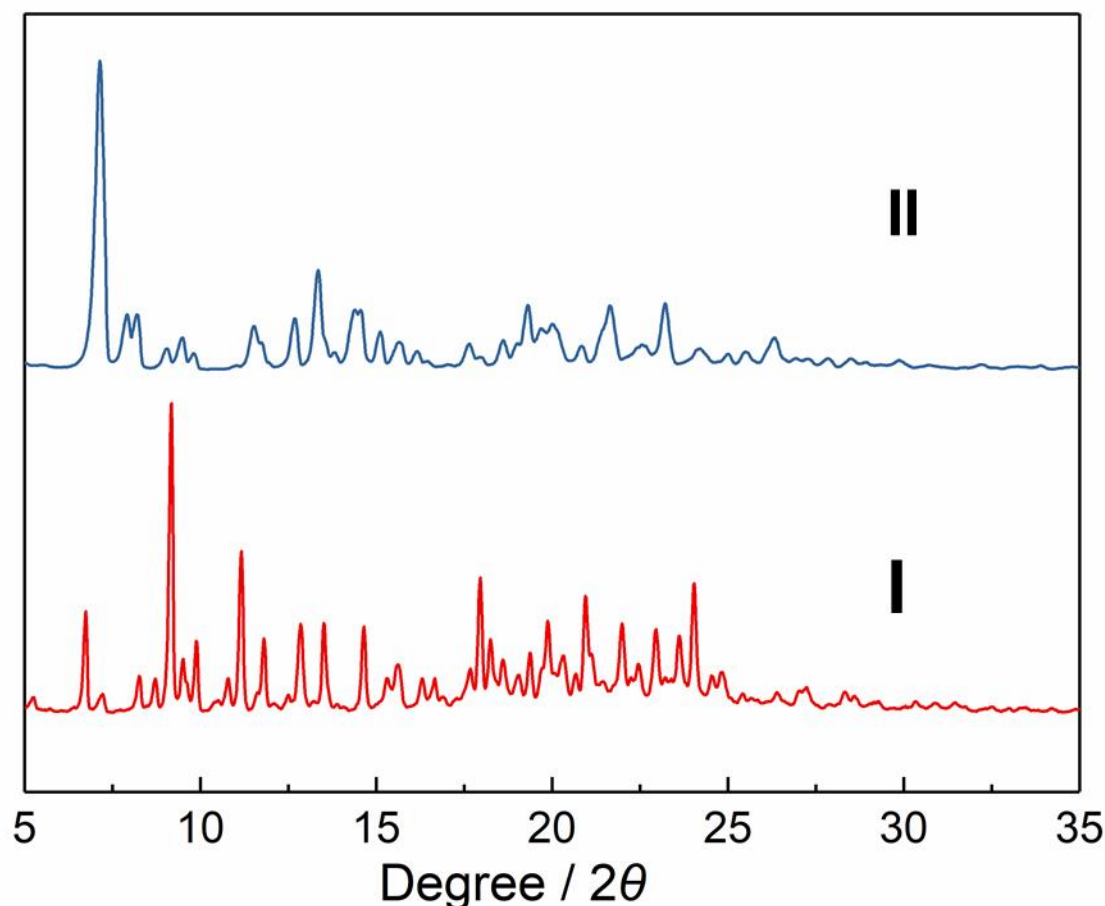

**Fig. S29.** PXRD patterns of **HB3**: (I) activated **HB3**; (II) initial synthetic **HB3**.

## 6. References

- [S1] J. Zhou, J. Yang, B. Hua, L. Shao, G. Yu, *Chem. Commun.* **2016**, 52, 1622–1624.
- [S2] K. Jie, M. Liu, Y. Zhou, M. A. Little, A. Pulido, S.-Y. Chong, A. Stephenson, A. R. Hughes, F. Sakakibara, T. Ogoshi, F. Blanc, G. M. Day, F. Huang, A. I. Cooper, *J. Am. Chem. Soc.* **2018**, *140*, 6921–6930.
- [S3] D. R. Lide, *CRC Handbook of Chemistry and Physics*, Boca Raton, FL, **2005**, pp. 203–365.
- [S4] Gaussian 09, Revision A.02; M. J. Frisch, G. W. Trucks, H. B. Schlegel, G. E. Scuseria, M. A. Robb, J. R. Cheeseman, G. Scalmani, V. Barone, B. Mennucci, G. A. Petersson, et al. Gaussian, Inc.: Wallingford, CT, **2009**
- [S5] C. Lee, W. Yang, R. Parr, Development of the Colle-Salvetti correlation-energy formula into a functional of the electron density, *Phys. Rev. B.* **1988**, *37*, 785–789.
- [S6] R. Ditchfield, W. Hehre, J. Pople, Self-consistent molecular-orbital methods. IX. An extended gaussian-type basis for molecular-orbital studies of organic molecules, *J.*

*Chem. Phys.* **1971**, *54*, 724–728.
